# Supplementary material
Source: HighWire-hosted journal article supplement (http://www.qdcxjkg.com/highwire/filestream/113600/field_highwire_adjunct_files/0/s1s2_tables_re_sarcoidosis_prevalence_-_incidence.pdf)
Supplement: s1s2_tables_re_sarcoidosis_prevalence_-_incidence.pdf [file s1s2_tables_re_sarcoidosis_prevalence_-_incidence.pdf]

**Supplemental Table 1 - Reviews of Sarcoidosis Incidence (Inc.) or Prevalence (Prev.)**

| Country                                                                                                                                                                                               | Ethnicity | Total number of subjects studied                                                                                    | Number of sarcoidosis subjects studied | Number of cases of pulmonary sarcoidosis                                                           | Incidence/ prevalence (per 100,000 population)                                                                                                                                                                 | Comments                                                                | Reference          |
|-------------------------------------------------------------------------------------------------------------------------------------------------------------------------------------------------------|-----------|---------------------------------------------------------------------------------------------------------------------|----------------------------------------|----------------------------------------------------------------------------------------------------|----------------------------------------------------------------------------------------------------------------------------------------------------------------------------------------------------------------|-------------------------------------------------------------------------|--------------------|
| Sweden<br>Nordic combined                                                                                                                                                                             | Multi     |                                                                                                                     | 505<br>7700                            | NS all                                                                                             | Inc 19.0<br>Inc 12.0<br>Prev 28                                                                                                                                                                                | 1966-1982<br>1950-1982                                                  | Hosoda Y,<br>1997. |
| Former GDR                                                                                                                                                                                            |           |                                                                                                                     | 1570                                   |                                                                                                    | Inc 8.1-10.2                                                                                                                                                                                                   | 1961-1984                                                               |                    |
| Japan                                                                                                                                                                                                 |           |                                                                                                                     | 1592                                   |                                                                                                    | Inc 1.2-1.4<br>Prev 3 -3.3                                                                                                                                                                                     | 1972                                                                    |                    |
| London, UK                                                                                                                                                                                            |           |                                                                                                                     | 2965                                   |                                                                                                    | Inc 1.2 -1.4<br>Prev 3.8-5.6                                                                                                                                                                                   | 1984<br>Table 5 of prior<br>intrathoracic disease in<br>3 ethnic groups |                    |
| Finland<br>Germany,<br>Netherlands, Italy<br>Norway<br>Sweden<br>Czechoslovakia<br>Hungary,<br>Poland,<br>Yugoslavia,<br>Canada,<br>Argentina,<br>Brazil,<br>Australia<br>New Zealand<br>UK<br>France | Multi     | 1430<br>3217<br>4591<br>17<br>1448<br>3204<br>3436<br>91<br>93<br>277<br>77<br>1035<br>1810<br>1571<br>1081<br>2577 | NS all                                 | 111<br>453<br>994<br>2<br>387<br>1890<br>118<br>5<br>10<br>33<br>8<br>34<br>4<br>145<br>171<br>301 | Prev 8.1<br>Prev 13.3 -14.5<br>Prev 21.6<br>Prev 11.6<br>Prev 26.7<br>Prev 55 -64<br>Prev 3.4<br>Prev 5<br>Prev 10.7<br>Prev 11.9<br>Prev >10.5<br>Prev 1 - 5<br>Prev 0.2<br>Prev 9.2<br>Prev 16<br>Prev 8 -19 | All patients had<br>pulmonary<br>disease                                | Leitch AG,<br>2000 |

|                                 |                                                       |                                                             |        |        |                                                                                                     |                                                                                      |                   |
|---------------------------------|-------------------------------------------------------|-------------------------------------------------------------|--------|--------|-----------------------------------------------------------------------------------------------------|--------------------------------------------------------------------------------------|-------------------|
| Portugal                        |                                                       | 207                                                         |        | 20     | Prev 10                                                                                             |                                                                                      |                   |
| Switzerland                     |                                                       | 3500                                                        |        | 6      | Prev 0.2                                                                                            |                                                                                      |                   |
| Japan                           |                                                       | 3161                                                        |        | 515    | Prev 16.3                                                                                           |                                                                                      |                   |
|                                 |                                                       | 193                                                         |        | 11     | Prev 5.6                                                                                            |                                                                                      |                   |
| Portugal,<br>Sweden,<br>Finland | Caucasian                                             | Numbers of patients not disclosed, except for autopsy data. | NS all | NS all | Prev 0.2<br>Prev 64<br>Prev 28.2<br>Inc 11.4                                                        | PubMed from 1966 to December 2004                                                    | Thomeer MJ, 2005  |
| USA (NW only)                   |                                                       |                                                             |        |        | Inc 4.8                                                                                             | Standardised data extraction form, with specific diagnostic criteria for sarcoidosis |                   |
| Denmark                         |                                                       |                                                             |        |        | Inc 8.1 (1980-84)<br>Inc 6.4 (1990-94)                                                              |                                                                                      |                   |
| Belgium                         |                                                       |                                                             |        |        | Prev 1.33<br>Inc 0.17                                                                               |                                                                                      |                   |
| USA                             | African ,<br>European<br>and<br>Japanese<br>Americans | NS                                                          | NS     | NS     | Incidence<br>Afr Ame 35–80<br>Eur Am 3–10<br>N. Europeans 15–20<br>S. Europeans 1–5<br>Japanese 1–2 |                                                                                      | Rybicki BA, 2007. |

NS = not stated

#### References for Supplemental Table 1

Hosoda Y, Yamaguchi M, Hiraga Y. Global epidemiology of sarcoidosis. What story do prevalence and incidence tell us? Clin Chest Med 1997;18:681-94.

Leitch AG. Sarcoidosis. Chapter 39. In: Seaton A, Seaton D and Leitch AG, Eds.

Thomeer MJ, Demedts M, Wuyts W. Epidemiology of sarcoidosis. Eur Respir Monograp 2005;32:13–22.

Rybicki BA, Major M, Popovich J Jr, Maliarik MJ, Iannuzzi MC. Racial differences in sarcoidosis incidence: a 5-year study in a health maintenance organization. Am J Epidemiol 1997;145(3):234-41.

**Supplementary Table 2.** Published papers and book chapters describing the incidence or prevalence of sarcoidosis in various populations.

| Country                   | Ethnicity                       | Study type<br>Prospective/cross-sectional/etc                                           | Total number of subjects studied | Number of sarcoidosis subjects studied                                       | Number of cases of pulmonary sarcoidosis | Incidence/prevalence (per 100,000 population)                                                                                             | Comments                                                                                           | Reference        |
|---------------------------|---------------------------------|-----------------------------------------------------------------------------------------|----------------------------------|------------------------------------------------------------------------------|------------------------------------------|-------------------------------------------------------------------------------------------------------------------------------------------|----------------------------------------------------------------------------------------------------|------------------|
| USA                       | Caucasian and African Americans | Retrospective search of pulmonary clinic and pathology Records of a large HMO 1990-1994 |                                  | 259 total<br>Number with extra thoracic disease<br>AfrAm 102<br>Caucasian 33 | NS                                       | Inc age adjusted<br>AfrAmerican F 39.1<br>AfrAmerican M 29.8<br>All Afr Am. 35.5<br>Caucasian F 12.1<br>Caucasian M 9.6<br>All Cauc. 10.9 |                                                                                                    | Rybicki BA, 1997 |
| Portugal, Sweden, Finland | Caucasian                       | Retrospective Search of published literature in PubMed from 1966 to December 2004       |                                  | NS<br>NS<br>NS                                                               | NS<br>NS<br>NS                           | Prev 0.2<br>Prev 64<br>Prev 28.2<br>Inc 11.4                                                                                              | Review of previously published papers. Numbers of patients not disclosed, except for autopsy data. | Thomeer MJ, 2005 |
| USA (NW only)             |                                 | Standardised questionnaire, with specific diagnostic criteria for sarcoidosis           |                                  | NS                                                                           | NS                                       | Inc 4.8                                                                                                                                   |                                                                                                    |                  |
| Denmark                   |                                 |                                                                                         |                                  | NS                                                                           | NS                                       | Inc 8.1 (1980-84)<br>Inc 6.4 (1990-94)                                                                                                    |                                                                                                    |                  |
| Belgium                   |                                 |                                                                                         |                                  |                                                                              | NS                                       | Prev 1.33<br>Inc 0.17                                                                                                                     |                                                                                                    |                  |
| Korea                     | Korean                          | Registries of serial autopsy reports                                                    | 6706                             | NS                                                                           | 43                                       | Inc 0.03 (1993)<br>Inc 0.13 (1998)<br>Prev 640                                                                                            | >80 bed hospitals (autopsies)                                                                      |                  |
| Sweden                    |                                 | Registries of serial autopsy reports                                                    | 9324                             |                                                                              | 31                                       | Prev 320                                                                                                                                  | autopsies                                                                                          |                  |
| Finland                   | Multi                           | Retrospective                                                                           | 1430                             |                                                                              | 111                                      | Prev 8.1                                                                                                                                  | All patients                                                                                       | Leitch AG.,      |

|                                                                                                                                                                                                                                   |       |                                                    |                                                                                                                                           |                                                 |                                                                                                                     |                                                                                                                                                                                                                                                    |                                                                                                                                                  |                    |
|-----------------------------------------------------------------------------------------------------------------------------------------------------------------------------------------------------------------------------------|-------|----------------------------------------------------|-------------------------------------------------------------------------------------------------------------------------------------------|-------------------------------------------------|---------------------------------------------------------------------------------------------------------------------|----------------------------------------------------------------------------------------------------------------------------------------------------------------------------------------------------------------------------------------------------|--------------------------------------------------------------------------------------------------------------------------------------------------|--------------------|
| Germany,<br>Netherlands,<br>Italy<br>Norway<br>Sweden<br>Czechoslovakia<br>Hungary,<br>Poland,<br>Yugoslavia,<br>Canada,<br>Argentina,<br>Brazil,<br>Australia<br>New Zealand<br>UK<br>France<br>Portugal<br>Switzerland<br>Japan |       | Review of global<br>published literature           | 3217<br>4591<br>17<br>1448<br>3204<br>3436<br>91<br>93<br>277<br>77<br>1035<br>1810<br>1571<br>1081<br>2577<br>207<br>3500<br>3161<br>193 |                                                 | 453<br>994<br>2<br>387<br>1890<br>118<br>5<br>10<br>33<br>8<br>34<br>4<br>145<br>171<br>301<br>20<br>6<br>515<br>11 | Prev 13.3 –14.5<br>Prev 21.6<br>Prev 11.6<br>Prev 26.7<br>Prev 55 –64<br>Prev 3.4<br>Prev 5<br>Prev 10.7<br>Prev 11.9<br>Prev >10.5<br>Prev 1 - 5<br>Prev 0.2<br>Prev 9.2<br>Prev 16<br>Prev 8 –19<br>Prev 10<br>Prev 0.2<br>Prev 16.3<br>Prev 5.6 | had<br>pulmonary<br>disease                                                                                                                      | 2000.              |
| Sweden<br>Nordic<br>combined<br><br>Former GDR<br><br>Japan                                                                                                                                                                       | Multi | Retrospective<br>review of published<br>literature |                                                                                                                                           | 505<br>7700<br><br>1570<br><br>1592<br><br>2965 | NS<br>NS<br><br>NS<br><br>NS<br><br>NS                                                                              | Inc 19.0<br>Inc 12.0<br>Prev 28<br><br>Inc 8.1-10.2<br><br>Inc 1.2-1.4<br>Prev 3 -3.3<br>Inc 1.2 -1.4<br>Prev 3.8-5.6                                                                                                                              | 1966-1982<br>1950-1982<br><br>1961-1984<br><br>1972<br><br>1984<br>Table 5 gives<br>prev<br>intrathoracic<br>dis in 3<br>London<br>ethnic groups | Hosoda Y,<br>1997. |

|             |                        |                                                                                      |  |                                                                     |                        |                                                                                                         |                                                                 |                        |
|-------------|------------------------|--------------------------------------------------------------------------------------|--|---------------------------------------------------------------------|------------------------|---------------------------------------------------------------------------------------------------------|-----------------------------------------------------------------|------------------------|
| UK          | NS                     | Retrospective Patient records from general practice database                         |  | 1019                                                                | 920                    | Inc 5                                                                                                   | 1991-2003                                                       | Gribbin J, 2006.       |
| Israel      | 65% Jewish<br>35% Arab | Retrospective Records of 6 hospitals                                                 |  | 120                                                                 | 76%<br>90%<br>thoracic | Inc 0.8                                                                                                 |                                                                 | Yigla M, 2002          |
| Iceland     | Caucasian              | Retrospective review of non-necrotizing granulomas                                   |  | 235                                                                 | NS                     | Inc 3.84                                                                                                |                                                                 | Haraldsdottir SO, 2007 |
| Spain       | Caucasian              | Prospective multicentre population-based registry                                    |  | 744 ILD pts<br>87 sarc                                              | NS                     | Inc overall 0.42<br>M 0.36<br>F 0.49                                                                    |                                                                 | López-Campos JL, 2004. |
| Greece      | Caucasian              | Questionnaire to depts of pneumonology                                               |  | 967 cases ILD<br>60 incident cases sarc<br>330 prevalent cases sarc | ?100%                  | Inc 1.07<br>Prev 5.89                                                                                   |                                                                 | Karakatsani A, 2009    |
| Switzerland | NS                     | Retrospective Study of patients hospitalised 2002 - 2005 identified hospital records |  | 2925 sarc (2002-5) before adjustments                               | NS                     | prev (ever diagnosed) 121<br>prev (currently active) 44<br>prev (requiring hospitalisation) 16<br>Inc 7 |                                                                 | Deubelbeiss U, 2010    |
| Finland     | NS                     | Finland : retrospective / Hospital records                                           |  | 1378                                                                | 49%                    | Inc 11.4<br>Prev 28.2                                                                                   | Finnish official statistics                                     | Pietinalho A, 1995     |
| Japan.      | NS                     | Japan: Prospective national survey hospitals (>200 beds)                             |  | 288                                                                 | 25%                    | Inc 1<br>Prev 3.7                                                                                       | state: 2158 sarc in 1984 but not all fitted diagnostic criteria |                        |
| USA         | African ,              | Case control                                                                         |  | NS                                                                  | NS                     | Incidence                                                                                               | Review of                                                       | Rybicki BA,            |

|             |                                 |                                                                    |                 |                |                |                                                                                        |                                                         |                   |
|-------------|---------------------------------|--------------------------------------------------------------------|-----------------|----------------|----------------|----------------------------------------------------------------------------------------|---------------------------------------------------------|-------------------|
|             | European and Japanese Americans |                                                                    |                 |                |                | Afr Ame 35–80<br>Eur Am 3–10<br>N. Europeans 15–20<br>S. Europeans 1–5<br>Japanese 1–2 | previously published papers                             | 2007.             |
| Singapore   | Chinese<br>Indian<br>Malay      | Review of hospital medical records from June 1998 to May 2004      | 1,749,495       | 59             | 47             | Overall inc 0.56<br>Chinese Inc 0.23<br>Indian Inc 4.57<br>Malay Inc 1.3               |                                                         | Anantham D, 2007. |
| UK (London) | Caucasians, blacks, asians      | Retrospective review of hospital medical records from 1969 to 1982 |                 | 68<br>59<br>29 | 34<br>42<br>15 | Caucasian Inc 1.5<br>Black Inc 19.8<br>Asian Inc 16.8                                  |                                                         | Edmonstone 1985.  |
| Turkey      | Turkish                         | Prospective. 25 investigators, 19 pulmonology clinics, 12 cities   | 189,000         | 293            | NS             | Inc 4                                                                                  | 2 year study                                            | Musellim B, 2009. |
| Croatia     | Caucasians                      | Retrospective registry in one hospital, 1997-2006                  | NS, 2001 census | 156            | NS             | Inc 3.3<br>Male 2.5<br>Female 3.9                                                      |                                                         | Mise, 2011        |
| Denmark     | Caucasians                      | Cohort study of births 1936-1993, assessed between 1982 and 2008   | 2.2M            | 9,772          | NS             | Prev 4.3                                                                               | Increased risk of presentation in year after childbirth | Jorgensen, 2011   |

HMO = health maintenance organisation; Inc = incidence; Prev = prevalence; NS = not stated; Afr = African; Am = American; Eur = European; M= male; F = female; ILD = interstitial lung disease; Sarc = sarcoidosis

### References for Supplemental Table 2

Rybicki BA, Major M, Popovich J Jr, Maliarik MJ, Iannuzzi MC. Racial differences in sarcoidosis incidence: a 5-year study in a health maintenance organization. *Am J Epidemiol* 1997;145(3):234-41.

Thomeer MJ, Demedts M, Wuyts W. Epidemiology of sarcoidosis. *Eur Respir Monograp* 2005;32:13–22.

- Leitch AG. Sarcoidosis. Chapter 39. In: Seaton A, Seaton D and Leitch AG, Eds.
- Hosoda Y, Yamaguchi M, Hiraga Y. Global epidemiology of sarcoidosis. What story do prevalence and incidence tell us? *Clin Chest Med* 1997;18:681-94.
- Gribbin J, Hubbard RB, Le Jeune I, Smith CJ, West J, Tata LJ. Incidence and mortality of idiopathic pulmonary fibrosis and sarcoidosis in the UK. *Thorax* 2006;61:980-5.
- Yigla M, Badarna-Abu-Ria N, Tov N, Ravell-Weiller D, Rubin AH. Sarcoidosis in northern Israel; clinical characteristics of 120 patients. *Sarcoidosis Vasc Diffuse Lung Dis* 2002;19:220-6.
- Haraldsdottir SO, Jörundsdóttir KB, Yngvason F, Björnsson J, Gíslason T. Sarcoidosis in Iceland 1981-2003. *Laeknabladid*. 2007;93:105-9.
- López-Campos JL, Rodríguez-Becerra E; Neumosur Task Group; Registry of Interstitial Lung Diseases. Incidence of interstitial lung diseases in the south of Spain 1998-2000: the RENIA study. *Eur J Epidemiol* 2004;19:155-61.
- Karakatsani A, Papakosta D, Rapti A, et al. Epidemiology of interstitial lung diseases in Greece. *Respir Med* 2009;103:1122-9.
- Deubelbeiss U, Gemperli A, Schindler C, Baty F, Brutsche MH. Prevalence of sarcoidosis in Switzerland is associated with environmental factors. *Eur Respir J* 2010;35:1088-97.
- Pietinalho A, Hiraga Y, Hosoda Y, Löfroos AB, Yamaguchi M, Selroos O. The frequency of sarcoidosis in Finland and Hokkaido, Japan. A comparative epidemiological study. *Sarcoidosis* 1995;12:61-7.
- Rybicki BA, Iannuzzi MC. Epidemiology of sarcoidosis: recent advances and future prospects. *Semin Respir Crit Care Med* 2007;28:22-35.
- Anantham D, Ong SJ, Chuah KL, Fook-Chong S, Hsu A, Eng P. Sarcoidosis in Singapore: epidemiology, clinical presentation and ethnic differences. *Respirology* 2007;12:355-60.
- Edmonstone WM, Wilson WG. Sarcoidosis in caucasians, blacks and asians in London. *Br J Dis Chest* 1985;79:27-36.
- Musellim B, Kumbasar OO, Ongen G, et al. Epidemiological features of Turkish patients with sarcoidosis. *Respir Med* 2009;103:907-12.
- Mise K, Jurcev-Savicevic A, Goic-Barisic I, Kozul K, Gudelj I. Sarcoidosis and tuberculosis in South Croatia: are there epidemiological similarities or not? *Public Health*. 2011;125:734-7.
